# Supplementary material for: Reduced expression of FOXE1 in differentiated thyroid cancer, the contribution of CPG methylation, and their clinical relevance
Source: PubMed Central journal article supplement (PMC11586194; doi:10.3389/fendo.2024.1454349), 2024-11-11
Supplement: DataSheet1.pdf [file DataSheet1.pdf]

### Supplementary Data

**Figure S1:** No difference in the methylation degree (%) of CpGisland1 in untreated (DMSO) and 5aza treated follicular carcinoma cells (FTC236, FTC238 and WRO) and melanoma cells (NPA) (mean  $\pm$ SEM). Black bar: DMSO samples; gray bar: 5aza samples.

**Figure S2** No difference in the methylation degree (%) of CpGisland1 between T and NT samples.

**Figure S3:** TCGA data analysis of the expression of FOXE1 target genes. Downregulation in T compared to NT of PAX8, TG, TPO, NIS and ZEB1, and upregulation T compared to NT of NKX2.1 and PDGFA \*  $p < 0.0001$ , no difference was observed for DUOX2 expression.

**Figure S4:** Patients' samples analysis of the expression of *TG* and *PAX8*. Low expression in T compared to NT samples without significance ( $P > 0.05$ ).

Figure S1

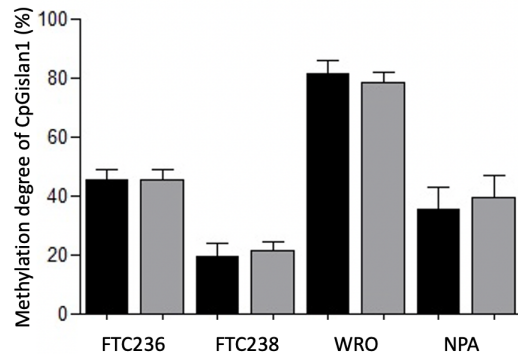

Figure S2

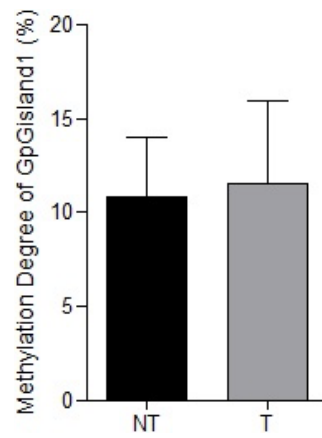

Figure S3

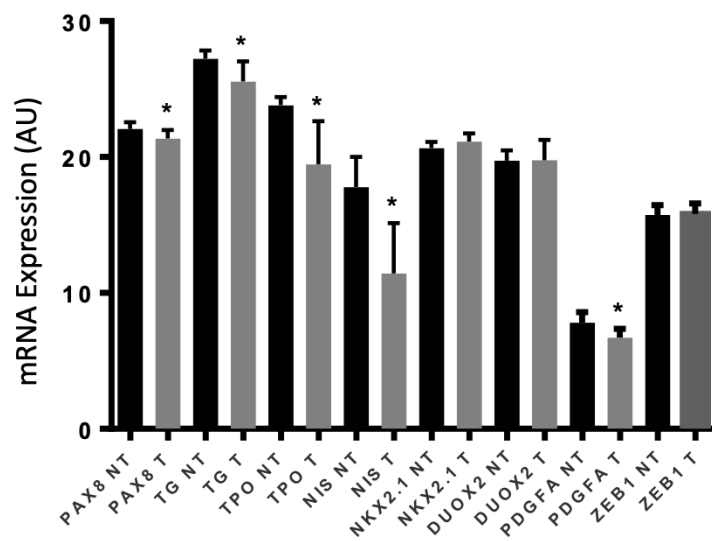

Figure S4

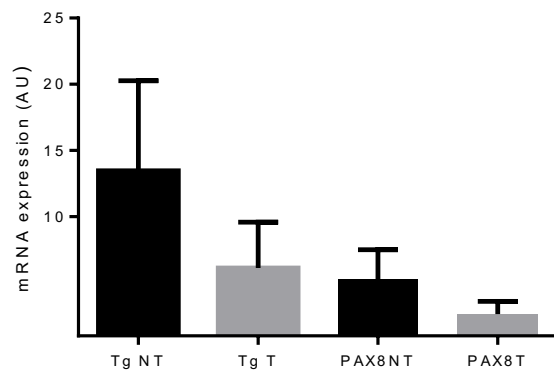

**Table S1: Clinical data of the patients.**

| ID | Age (Y) | Gender | Histology Variant |                          | Ultrasound Focality | Lymph Node Involvement | T N M staging |     |    |
|----|---------|--------|-------------------|--------------------------|---------------------|------------------------|---------------|-----|----|
| 1  | 45      | M      | PTC               | Classical                | Unifocal            | Reactive               | T1a           | N0  | M0 |
| 2  | 30      | F      | PTC               | Classical                | Unifocal            | Reactive               | T1b           | N0  | M0 |
| 3  | 49      | M      | PTC               | Classical                | Unifocal            | Pathological           | T1a           | N1a | M1 |
| 4  | 49      | F      | PTC               | Classical                | -                   | -                      | -             | -   | -  |
| 5  | 57      | F      | PTC               | Classical                | Multifocal          | Reactive               | T3            | N0  | M1 |
| 6  | 38      | F      | PTC               | Classical                | Unifocal            | Reactive               | T3            | N0  | M0 |
| 7  | 54      | M      | PTC               | Classical                | Multifocal          | Reactive               | T1a           | N1a | M1 |
| 8  | 30      | F      | PTC               | Classical                | Multifocal          | Pathological           | T3            | N1b | M0 |
| 9  | 64      | F      | PTC               | Classical/<br>Follicular | Absent              | Absent                 | -             | -   | -  |
| 10 | 27      | F      | PTC               | Classical                | Multifocal          | Reactive               | T1b           | N0  | M0 |
| 11 | 55      | F      | PTC               | Follicular               | Multifocal          | Pathological           | T1a           | N0  | M0 |
| 12 | 27      | F      | PTC               | Classical                | Multifocal          | Reactive               | T1a           | N1a | M0 |
| 13 | -       | F      | PTC               | Classical                | Absent              | Absent                 | -             | -   | -  |
| 14 | 22      | F      | PTC               | Classical                | Absent              | Absent                 | -             | -   | -  |
| 15 | 24      | F      | PTC               | Classical                | -                   | -                      | -             | -   | -  |
| 16 | 32      | F      | PTC               | Solid                    | Unifocal            | Pathological           | T3            | N1a | M0 |
| 17 | 42      | F      | PTC               | Classical                | Multifocal          | Reactive               | T3            | N0  | M0 |
| 18 | 48      | M      | PTC               | Classical                | Multifocal          | -                      | T1a           | N0  | M0 |
| 19 | 49      | F      | PTC               | Classical                | Multifocal          | Reactive               | T1a           | N0  | M0 |
| 20 | 31      | F      | PTC               | Tall cell                | Absent              | Absent                 | -             | -   | -  |
| 21 | 40      | F      | PTC               | Diffuse<br>Sclerosing    | -                   | -                      | -             | -   | -  |
| 22 | -       | F      | PTC               | Classical                | Absent              | Absent                 | -             | -   | -  |
| 23 | 59      | F      | PTC               | Clear cell               | Absent              | Absent                 | -             | -   | -  |
| 24 | -       | M      | PTC               | Oncocytic                | Absent              | Absent                 | -             | -   | -  |
| 25 | -       | F      | PTC               | Classical                | Absent              | Absent                 | -             | -   | -  |
| 26 | 31      | M      | PTC               | Classical                | Absent              | Pathological           | -             | -   | -  |
| 27 | 44      | F      | PTC               | Classical                | Unifocal            | Reactive               | T1a           | N0  | M0 |
| 28 | -       | F      | PTC               | Classical                | Absent              | Absent                 | -             | -   | -  |
| 29 | -       | F      | PTC               | Classical                | Absent              | Absent                 | -             | -   | -  |
| 30 | 47      | F      | PTC               | Classical                | -                   | -                      | -             | -   | -  |
| 31 | 49      | F      | PTC               | Classical                | Absent              | Absent                 | -             | -   | -  |
| 32 | 44      | F      | PTC               | Classical                | -                   | -                      | -             | -   | -  |
| 33 | -       | F      | PTC               | Follicular               | -                   | -                      | -             | -   | -  |

**Table S2:** Primer sequences, PCR conditions and product sizes.

| Gene/region       | Sequence (5'-3')                          | Application | Annealing (°C) | Product size (pb) |
|-------------------|-------------------------------------------|-------------|----------------|-------------------|
| <b>FOXE1</b>      | F: GGAGCCCCCTACTCTTTGAC                   | Expression  | 60             | 100               |
|                   | R: TTGTCTGGAAGAGCCTGGAT                   |             |                |                   |
| <b>S8</b>         | F: AACAAGAAATACCGTGCCC                    | Expression  | 60             | 100               |
|                   | R: GTACGAACCAGCTCGTTATTAG                 |             |                |                   |
| <b>CpGIsland1</b> | F: TAGGGTTTTAGAATTTAATTGAAATG             | BS          | 57             | 200               |
|                   | R: ATCACTATCACCCAAAAACAAAATA              |             |                |                   |
| <b>CpGIsland2</b> | F: GTAAGGATTTGGGTTTTGTTT                  | BS          | 57             | 355               |
|                   | R: AAAACCTCAATATTCTACTCTATTA              |             |                |                   |
| <b>CpGIsland2</b> | F: CCGGGT <b>ACCG</b> TTTAGCGAGTGTAAGCCCC | Cloning     | 60             | 500               |
|                   | R: CCGCT <b>CGAG</b> GCCATTCCTGGGAGATCCA  |             |                |                   |

BS: Bisulfite sequencing, bold sequences indicate restriction sites (*Kpn1*, *Xho1*)

**Table S3:** Patients characteristics from The Cancer Genome Atlas (TCGA) database

|                                                |                           | <b>Number</b> | <b>Percentage</b> |
|------------------------------------------------|---------------------------|---------------|-------------------|
| <b>Diagnosis age</b>                           | <45                       | 235           | 46.3              |
|                                                | ≥45                       | 273           | 53.7              |
| <b>Gender</b>                                  | Female                    | 369           | 72.9              |
|                                                | Male                      | 137           | 27.1              |
| <b>Race</b>                                    | White                     | 333           | 65.6              |
|                                                | Black or African American | 26            | 5.1               |
|                                                | Asian                     | 51            | 10                |
|                                                | Not determined            | 98            | 19.3              |
| <b>Ethnicity</b>                               | Hispanic or Latin         | 38            | 7.5               |
|                                                | No Hispanic or Latin      | 359           | 70.7              |
|                                                | Not determined            | 111           | 21.9              |
| <b>Histological type</b>                       | Classical                 | 362           | 71.3              |
|                                                | Follicular                | 102           | 20.1              |
|                                                | Tall cells                | 34            | 6.7               |
|                                                | Others                    | 8             | 1.6               |
|                                                | Not determined            | 2             | 0.4               |
| <b>Pathologic T stage</b>                      | T1                        | 44            | 8.7               |
|                                                | T1a                       | 19            | 3.7               |
|                                                | T1b                       | 80            | 15.7              |
|                                                | T2                        | 168           | 33.1              |
|                                                | T3                        | 173           | 34.1              |
|                                                | T4                        | 9             | 1.8               |
|                                                | T4a                       | 12            | 2.4               |
|                                                | Not determined            | 3             | 0.6               |
| <b>Pathologic N stage</b>                      | N0                        | 226           | 44.5              |
|                                                | N1                        | 59            | 11.6              |
|                                                | N1a                       | 91            | 17.9              |
|                                                | N1b                       | 80            | 15.7              |
|                                                | NX                        | 50            | 9.8               |
|                                                | Not determined            | 2             | 0.4               |
| <b>Pathologic M stage</b>                      | M0                        | 281           | 55.3              |
|                                                | M1                        | 9             | 1.8               |
|                                                | MX                        | 21            | 42.3              |
|                                                | Not determined            | 3             | 0.6               |
| <b>AJCC</b>                                    | I                         | 288           | 50.9              |
|                                                | II                        | 51            | 11.4              |
|                                                | III                       | 110           | 24.6              |
|                                                | IV                        | 2             | 0.4               |
|                                                | IVa                       | 47            | 10.5              |
|                                                | IVc                       | 6             | 1.3               |
|                                                | Not determined            | 4             | 0.9               |
| <b>Disease free status</b>                     | Free                      | 445           | 87.6              |
|                                                | Recurrent or Progressive  | 49            | 9.6               |
|                                                | Not determined            | 14            | 2.8               |
| <b>Overall survival</b>                        | Living                    | 492           | 97.2              |
|                                                | Diseased                  | 14            | 2.8               |
| <b>New neoplasm event post initial therapy</b> | Yes                       | 12            | 2.4               |
|                                                | No                        | 250           | 49.2              |
|                                                | Not determined            | 246           | 48.4              |
| <b>Surgical margins</b>                        | R0                        | 387           | 76.2              |
|                                                | R1                        | 53            | 10.4              |
|                                                | R2                        | 4             | 0.8               |
|                                                | RX                        | 30            | 5.9               |
|                                                | Not determined            | 34            | 6.7               |

**Table S4:** Correlation analysis of FOXE1 mRNA expression and CpGisland2' methylation degree with the expression of genes regulated by FOXE1.

| Gene              | FOXE1 mRNA |                    | CpGisland2' methylation |                    |
|-------------------|------------|--------------------|-------------------------|--------------------|
|                   | r          | P                  | r                       | P                  |
| Tumor samples     |            |                    |                         |                    |
| <i>PAX8</i>       | 0.34       | <b>&lt; 0.0001</b> | -0.31                   | <b>&lt; 0.0001</b> |
| <i>TG</i>         | 0.29       | <b>&lt; 0.0001</b> | -0.28                   | <b>&lt; 0.0001</b> |
| <i>TPO</i>        | 0.30       | <b>&lt; 0.0001</b> | -0.04                   | 0.1586             |
| <i>DUOX2</i>      | 0.21       | <b>&lt; 0.0001</b> | -0.36                   | <b>&lt; 0.0001</b> |
| <i>NIS</i>        | -0.03      | 0.5032             | -0.24                   | <b>&lt; 0.0001</b> |
| <i>NKX2.1</i>     | 0.17       | <b>0.0002</b>      | 0.09                    | <b>0.0181</b>      |
| <i>PDGFA</i>      | -0.23      | <b>&lt;0.0001</b>  | 0.11                    | <b>0.001</b>       |
| <i>ZEB1</i>       | 0.14       | <b>&lt; 0.0001</b> | -0.36                   | <b>&lt; 0.0001</b> |
| Non tumor Samples |            |                    |                         |                    |
| <i>PAX8</i>       | 0.60       | <b>&lt; 0.0001</b> | -0.37                   | <b>0.008</b>       |
| <i>TG</i>         | 0.63       | <b>&lt; 0.0001</b> | -0.28                   | <b>0.051</b>       |
| <i>TPO</i>        | 0.46       | <b>0.0005</b>      | -0.03                   | 0.82               |
| <i>NIS</i>        | 0.31       | <b>0.024</b>       | -0.49                   | <b>0.0003</b>      |
| <i>NKX2.1</i>     | 0.27       | 0.051              | 0.05                    | 0.73               |
| <i>PDGFA</i>      | -0.21      | 0.10               | -0.29                   | <b>0.035</b>       |
| <i>ZEB1</i>       | 0.03       | 0.80               | -0.21                   | 0.17               |
| <i>DUOX2</i>      | 0.48       | <b>0.0003</b>      | -0.49                   | <b>0.0003</b>      |

Bold values indicate statistical significance.
